# Supplementary material
Source: Springer Nature journal article supplement (https://www.springermedizin.de/resource/supplementary/12882_2013_722_MOESM4_ESM.docx/9454562)

Figure 4: Cox proportional hazard regression plot of the survival of 53 children adolescents with ESRD, by presence and absence of acute dialysis management: University College Hospital Ibadan, Nigeria, 2005-2012


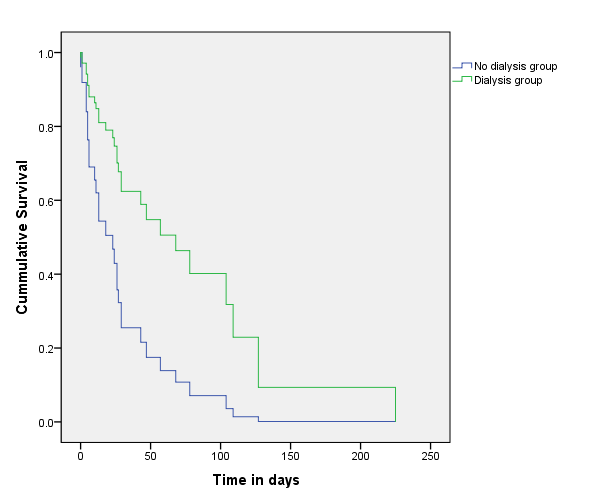

Supplement: MOESM4 [file 9454562]
